# Supplementary material for: Identification of the powdery mildew resistance gene in wheat breeding line Yannong 99102-06188 via bulked segregant exome capture sequencing
Source: Front Plant Sci. 2022 Sep 6;13:1005627. doi: 10.3389/fpls.2022.1005627 (PMC9489141; doi:10.3389/fpls.2022.1005627)
Supplement: Supplementary Table 1 — Validation of pmYN99102-linked markers on 42 Chinese wheat cultivars/breeding lines in marker-assisted selection (MAS) breeding. [file Table_1.XLSX]

## Sheet: Sheet1
Supplementary Table S1 Validation of PmYN99102-linked markers on 42 Chinese wheat cultivars/breeding lines in marker-assisted selection (MAS) breeding
Genotypes	Region	YTU103-2626	YTU103-41	YTU103-69	YTU103-71	YTU103-108	YTU103-113	YTU103-54	YTU103-87	YTU103-88	YTU103-97	CITO2g-2	CISSRO2G-6	CITO2g-15	CITO2g-13	CITO2g-3	CITO2g-17	CITO2g-18	CITO2g-20
Yannong99102-06188	Shandong	+	+	+	+	+	+	+	+	+	+	+	+	+	+	+	+	+
Shannong 1538	Shandong	-	-	-	+	-	-	-	-	-	+	-	-	-	-	+	-	+	+
Hanmai 13	Hebei	-	-	-	+	-	-	-	-	+	+	-	-	-	-	-	-	+	+
Huaimai 0226	Jiangsu	-	-	-	-	-	+	-	-	-	+	-	-	-	-	-	-	+	-
Zhoumai 27	Henan	-	-	-	-	-	-	-	-	-	-	-	-	-	-	-	-	-	-
Xinong 979	Shanxi	-	-	-	+	-	-	-	-	-	+	-	-	-	-	+	-	+	+
Lumai 185	Shandong	-	-	-	+	-	-	-	-	-	+	-	-	-	-	+	-	+	+
Zhoumai 1311	Beijing	-	-	-	-	-	-	-	-	-	+	-	-	-	-	-	-	+	-
Jimai 268	Shandong	-	-	-	-	-	-	-	-	-	+	-	-	-	-	-	-	-	-
Tainong 1014	Shandong	-	-	-	-	-	+	-	-	-	+	-	-	-	-	-	-	-	-
Jimai 229	Shandong	-	-	-	-	-	-	-	-	-	+	-	-	-	-	-	-	+	-
Jimai 21	Shandong	-	-	-	-	-	-	-	-	-	+	-	-	-	-	-	-	+	-
Jimai 20	Shandong	-	-	-	-	-	-	-	-	-	+	-	-	-	-	-	-	-	-
Daimai 2173	Shandong	-	-	-	-	-	-	-	-	-	-	-	-	-	-	-	-	+	-
Zhoumai 1751	Beijing	-	-	-	-	-	+	-	-	-	-	-	-	-	-	-	-	+	-
Jinan 17	Shandong	-	-	-	+	-	-	-	-	-	+	-	-	-	-	+	-	+	+
Zhoumai 9398	Beijing	-	-	-	+	-	-	-	-	-	+	-	-	-	-	-	-	-	-
Womai 8	Anhui	-	-	-	+	-	-	-	-	+	+	-	-	-	-	+	-	+	+
Liangxing 619	Shandong	-	-	-	-	-	-	-	-	-	+	-	-	-	-	-	-	-	-
Shimai 15	Hebei	-	-	-	+	-	-	-	-	-	+	-	-	-	-	+	-	+	+
Xinluo 4	Henan	-	-	-	-	-	+	-	-	-	+	-	-	-	-	-	-	-	-
Qingmai 6	Shandong	-	-	-	-	-	-	-	-	-	+	-	-	-	-	-	-	-	-
Zhoumai 27	Henan	-	-	-	+	-	-	-	-	-	+	-	-	-	-	+	-	+	+
Wunong 6	Shanxi	-	-	-	+	-	-	+	-	-	+	-	-	-	+	-	-	+	+
Taimai1918	Shandong	-	-	-	-	-	-	-	-	-	+	-	-	-	-	-	-	-	-
Huixianhong	Henan	-	-	-	-	-	-	-	-	-	+	-	-	-	-	-	-	-	-
Pumai28	Henan	-	-	-	-	-	+	+	-	-	-	-	-	-	+	-	-	-	-
Zhongxinmai77	Hebei	-	-	-	-	-	-	-	-	-	+	-	-	-	-	-	-	-	-
Yannong 15	Shandong	-	-	-	-	-	-	-	-	-	+	-	-	-	-	-	-	-	-
Yannong 17	Shandong	-	-	-	-	-	+	-	-	-	+	-	-	-	-	-	-	-	-
Yannong 23	Shandong	-	-	-	-	-	-	-	-	-	+	-	-	-	-	-	-	-	-
Yannong 24	Shandong	-	-	-	-	-	-	-	-	-	+	-	-	-	-	-	-	-	-
Yannong 161	Shandong	-	-	-	-	-	-	-	-	-	+	-	-	-	-	-	-	-	-
Yannong 191	Shandong	+	+	+	+	+	+	+	+	-	+	+	+	-	+	+	+	+	+
Yannong 301	Shandong	-	-	-	-	-	+	-	-	+	+	-	-	-	-	-	-	-	-
Yannong 390	Shandong	-	-	-	+	-	-	-	-	-	+	-	-	-	-	+	-	+	+
Yannong 572	Shandong	+	+	+	+	-	+	+	-	-	+	+	+	+	+	+	-	+	+
Yannong 745	Shandong	-	-	-	-	-	-	-	-	-	+	-	-	-	-	-	-	-	-
Yannong 836	Shandong	-	-	-	-	-	-	-	-	-	+	-	-	-	-	-	-	-	-
Yannong 1212	Shandong	-	-	-	+	-	-	-	-	-	+	-	-	-	-	+	-	-	+
Yannong 2415	Shandong	-	-	-	-	-	-	-	-	-	+	-	-	-	-	-	-	-	-
Yannong 5158	Shandong	-	-	-	-	-	-	-	-	-	+	-	-	-	-	-	-	-	-
Yannong 999	Shandong	-	-	-	-	-	-	-	-	-	+	-	-	-	-	-	-	-	-
Yannong 215	Shandong	-	-	-	-	-	-	-	-	-	+	-	-	-	-	-	-	-	-
Yannong 199	Shandong	-	-	-	-	-	-	-	-	-	+	-	-	-	-	-	-	-	-
Note: "-" indicates that the markers did not amplify the polymorphic products linked to PmYN99102 in relevant cultivar genetic background, and " +" shows that amplification occurred.
