# Supplementary material for: Identification of the powdery mildew resistance gene in wheat breeding line Yannong 99102-06188 via bulked segregant exome capture sequencing
Source: Front Plant Sci. 2022 Sep 6;13:1005627. doi: 10.3389/fpls.2022.1005627 (PMC9489141; doi:10.3389/fpls.2022.1005627)
Supplement: Supplementary Table 2 — Molecular markers developed by bulked segregant exome capture sequencing (BSE-Seq). [file Table_2.XLSX]

## Sheet: Sheet1
Supplementary Table S2 Molecular markers developed by bulked segregant exome capture sequencing (BSE-Seq)
Marker	Location	FORWARD PRIMER1 (5'-3')	REVERSE PRIMER1 (5'-3')
YTU103-26	chr2B:680042044-680043045	TGTCGCTGTCACTTGCTGAT	TCACCAGCACATGAGTCACC
YTU103-27	chr2B:685265408-685266409	CTGACGGCCCAATACACCTT	TCCACAAAAGAGTCTCCCGC
YTU103-28	chr2B:690034107-690035108	AAATGGGGCCAGAAAAACGC	GACGTGTGTGTGTGTGTGTG
YTU103-29	chr2B:695106869-695107870	GATCCTCCGGCCTACAATGG	TGACGGACACATACCACACG
YTU103-30	chr2B:699077589-699078590	GAGGGGCGTCGTCTCTAATG	GATGATGCGTTGCAGCTCTG
YTU103-40	chr2B:680664435-680665436	GTACCTGGTGCCATGTACCC	GAGTACATGGACAACGGCGA
YTU103-41	chr2B:680805143-680806144	AGCTTGAACTTGCCGGCTAT	CAGCTTCATGGACAGGCTCA
YTU103-42	chr2B:681123651-681124652	CAGGTCATACCACCACCACC	CCTCCCCATGGCCAATTCTT
YTU103-43	chr2B:682013688-682014689	GCTAGAAGGAGGGCTCGAAC	GTCACCAGGTGAAGTCCCAG
YTU103-44	chr2B:683001339-683002340	AGCGTGCAAAAGAGGATGGA	ATACTCCATTGCTCGCTCCG
YTU103-46	chr2B:686045068-686046069	CTTCCTCCATTGACCACGCT	GCGAGAGATTCATCCAGCGA
YTU103-48	chr2B:691047894-691048895	GAACACTGTTGTCGTTCCGC	AGCTTCTTTGAGGACCTGGC
YTU103-49	chr2B:691415404-691416405	CATCAACCTACACCGCCCTT	CGTGTTCCTCCTGTCTGACC
YTU103-50	chr2B:692070935-692071936	TTTGTCGAAGCCCCTTGGTT	CCAGAGAATTTCCAAGCGCG
YTU103-51	chr2B:693071509-693072510	TACCTCCTTGTCCCCCGATT	CATACGTTCATGCTGGCTGC
YTU103-52	chr2B:694050890-694051891	AACAGCCCACAGTCTGACAG	TCCTTGTCAGGGAACATCGC
YTU103-54	chr2B:696080372-696081373	AGGGCAAAAGATGGAGGTCG	TCGTTCAAGGGCATCAGCAT
YTU103-55	chr2B:697007173-697008174	TCTCCCTCCCGAGTACAAGG	GCGCAGGTAGTCATCATCCA
YTU103-56	chr2B:697666396-697667397	AGTTACACGCTGACATGGCA	ATGTGTCTTCGGTCGACCAC
YTU103-57	chr2B:697977454-697978455	CAAATCGGTGCCACATAGCG	AGTCATGGGGCCTAGCACTA
YTU103-58	chr2B:698214153-698215154	TGGTACACAAGGGAGTGCAG	TATGCATTGGAAGGCCAGCA
YTU103-59	chr2B:699108235-699109236	GGGCGGGTTGGGAAAATCTA	AGATCCTTGGGGCATGTGTG
YTU103-60	chr2B:699110063-699111064	GCATTTGTCGGCACTTGTGT	TGGAGGACCTAATACCCGCA
YTU103-61	chr2B:699222657-699223658	GCGGATTCTGTGAGGTGGAA	TTTGGCCTGAAACCAGTGGT
YTU103-63	chr2B:699721016-699722017	CTCGATGATGGGTCAGGTCG	GCGCATTCTGTGTGTCCTTG
YTU103-64	chr2B:699894975-699895976	CTGTCAAAGCACACACCAGC	CCTCAATTCCATCCCGCACT
YTU103-65	chr2B:699899774-699900775	GCTGCTAAGGCTCTTCGTCT	TAGCAGGTGCCAATGAGAGC
YTU103-67	chr2B:698215861-698216862	GAAAGGCAGTGACACATCGC	AGATTGACTGCGTCGTGTGT
YTU103-68	chr2B:698215910-698216911	CCCATAGGCCACACGGTAAG	GGGTTAGTCGTTGAGGCCAA
YTU103-69	chr2B:698301932-698302933	CGAGCGTGATGTAGACCTCC	GTTTTTCCAGGCCAGCAAGG
YTU103-70	chr2B:698589839-698590840	CAGCAACAAGAACAAGCGCT	TTCGGAATTCGCTTGTGGGA
YTU103-71	chr2B:698963503-698964504	CTCGTCGCCAAATGCTGATG	AGGCGGTTGATAGAGCACAC
YTU103-72	chr2B:698964952-698965953	ACAAATTGGTCGCCGTACCT	TCAGAGGGATTGTTCGGTGC
YTU103-73	chr2B:698967929-698968930	GACGTTCTGGCTGGTACCAA	GGCTGGTTCATCACACAGGA
YTU103-75	chr2B:699107383-699108384	AAAGAACGTTGGTTGCAGCC	TAGATTTTCCCAACCCGCCC
YTU103-77	chr2B:699109830-699110831	CGAAGCTTGACAAGGTCCCT	ACACAAGTGCCGACAAATGC
YTU103-79	chr2B:699178338-699179339	TGGGATTTTGAGGACCCACG	GGTCAAGGTGGACAAGGAGG
YTU103-80	chr2B:699183164-699184165	CCAGCTTTCCGTCTAGCACA	TGGTAAGAGGTTGCCGGATG
YTU103-81	chr2B:699184324-699185325	GGGGATGTCATCACCGTTGT	AGTCCAAGCAATCGAAGCGA
YTU103-83	chr2B:699280394-699281395	CTCGGGCTCAATACTCCGAC	GAACCCGCGCTTTTGTTTCT
YTU103-84	chr2B:699750532-699751533	TACTGACCCTTTCGTGTGGC	CTGGAAGAACTGCCTGGGAG
YTU103-86	chr2B:697992380-697993381	ATGCACCTGAAGACCAGCTC	AGCCGAAGCAGTGAGTACAC
YTU103-87	chr2B:697993507-697994508	AGCCGTTCCTTGATGTCAGG	ACTCCCATCGAGGATCCACA
YTU103-88	chr2B:698590771-698591772	CTCGCGCAAGAACACACAAA	ACCTGCTCTGGATGCTTGAC
YTU103-90	chr2B:698969064-698970065	CAATCCCTAGTCGGTCTCGC	TGGGGTTCTGAGGCGTTTTT
YTU103-91	chr2B:699101642-699102643	CAAGAGGATGCAGGCCAAGA	CTTGTCTTTATCACGCGGCG
YTU103-92	chr2B:699108376-699109377	CACACATGCCCCAAGGATCT	TCTCTGGCGTGTTCTTTCCC
YTU103-93	chr2B:699173108-699174109	CAACAACAGTTGCGATGCCA	TAACTGATGGCGGAGAGGGA
YTU103-94	chr2B:699178086-699179087	ACTATGTCAGGGAGAGCGGT	AGACTGAACAGAGAGGGGCT
YTU103-95	chr2B:699183106-699184107	GTGGCAAGAAAGGGCAGTTG	GCAACATGGTGGCTCTCTCA
YTU103-96	chr2B:680103722-680104723	CTTCCCTTCCGCCACCTATC	GCTCAGCGAGGTAGAAGGTC
YTU103-97	chr2B:680597479-680598480	CTAGGGCTGGACCAGTTTGG	AGTTGTGGAAATCGGCGGAT
YTU103-98	chr2B:681539126-681540127	GCAACTTGTTCCCTGCTGTG	AGCAAGTGACTCCTTGTCCG
YTU103-99	chr2B:682018014-682019015	CTCAATAGCTCGGCCGCTTA	TGTCGTCGCCAATGAGTTCA
YTU103-100	chr2B:682851127-682852128	GAAGACCCATCGTGGAAGCA	TGGTCTGTCCACAATCCGTG
YTU103-101	chr2B:683004438-683005439	GGGAGAGCCGTCAAAGAACA	CTTCTCATTTTCTCCGCGCG
YTU103-102	chr2B:683057729-683058730	GTCCTTCACTCCTCAAGGCC	TCGAAACAAGCAAGTTGGCG
YTU103-103	chr2B:685266280-685267281	CGGAAGCGTTCAAAAGCCAA	CCCCTTGGATGTCCTGTGAC
YTU103-104	chr2B:688430299-688431300	CTTGGCGACATGTGAGTCCT	TCTTCGGCAGCTTCTCCTTG
YTU103-105	chr2B:690748036-690749037	TCGAGGCGCTTCTTCACTTT	TTGCAATGGTGTTGCTCTGC
YTU103-106	chr2B:691186868-691187869	AGACGGGGATGTACAGGTGA	CTCCATTCTTGAGCATGCGC
YTU103-107	chr2B:691809972-691810973	GACGCCAATCGAACAAGAGC	ACGCTTCAACACAACGCTTC
YTU103-108	chr2B:692161592-692162593	GTCAGGCCTGGGAGGAATTC	CCATGGAAGGAGGAGGAGGA
YTU103-109	chr2B:692615090-692616091	CCGATTACCTGCAGCTCGAT	TCCAGCTTGGACTTGTCGAC
YTU103-110	chr2B:693337140-693338141	CTTGGGGGATCACTTGGCAT	TGGTGCCTCCATGTCCTCTA
YTU103-111	chr2B:693450401-693451402	TGCGAGCAGTTTCTTGTTGC	TCTAGTCTCTTGCTCCGGCT
YTU103-112	chr2B:694541407-694542408	GCATTCCAAGGCAGCTTTCC	TTTGCTTGGTCCCTCTGTCC
YTU103-113	chr2B:695372385-695373386	CTGCTGACAGTACGGTGTGT	CGCCAGCAGATTAACCATGC
YTU103-114	chr2B:695842768-695843769	TTGCGCTGAGACGTTTTTGG	AGTGCCTCTACTGCCACAAC
YTU103-115	chr2B:696375685-696376686	AGGAGCTTCATGGCCTTCAC	TCACTGTGAGCGACTGACAC
