# Supplementary material for: Identification of the powdery mildew resistance gene in wheat breeding line Yannong 99102-06188 via bulked segregant exome capture sequencing
Source: Front Plant Sci. 2022 Sep 6;13:1005627. doi: 10.3389/fpls.2022.1005627 (PMC9489141; doi:10.3389/fpls.2022.1005627)
Supplement: Supplementary Table 3 — Gene annotation in the candidate interval of wheat powdery mildew resistance gene pmYN99102. [file Table_3.XLSX]

## Sheet: Supplementary Table S3
Supplementary Table S3 Gene annotation in the candidate interval of wheat powdery mildew resistance gene pmYN99102
Gene ID	Gene Annotation
TraesCS2B01G505200	Disease resistance protein-like
TraesCS2B01G505300	GDSL esterase/lipase
TraesCS2B01G505400	Kinesin-like protein
TraesCS2B01G505500	Kinesin-like protein
TraesCS2B01G505600	Importin subunit beta-1
TraesCS2B01G505700	zinc finger WD40 repeat protein 1
TraesCS2B01G505800	Protein kinase superfamily protein
TraesCS2B01G505900	Werner Syndrome-like exonuclease
TraesCS2B01G506000	Kinase-like
TraesCS2B01G506100	Mitochondrial transcription termination factor-like
TraesCS2B01G506200	dipeptide transport ATP-binding protein
TraesCS2B01G506300	RNA helicase
TraesCS2B01G506400	Protein trichome birefringence-like 2
TraesCS2B01G506500	Importin subunit beta-1
TraesCS2B01G506600	Glycosyltransferase
TraesCS2B01G506700	Protein SDA1-like protein
TraesCS2B01G506800	RNA-binding protein
TraesCS2B01G506900	F-box family protein
TraesCS2B01G507000	Disease resistance protein
TraesCS2B01G507100	NBS-LRR disease resistance protein
TraesCS2B01G507200	DNA oxidative demethylase ALKBH2
TraesCS2B01G507300	Anthocyanidin reductase
TraesCS2B01G507400	Retrotransposon protein
TraesCS2B01G507500	Anthocyanidin reductase
TraesCS2B01G507600	Anthocyanidin reductase
TraesCS2B01G507700	Anthocyanidin reductase
TraesCS2B01G507800	Anthocyanidin reductase
TraesCS2B01G507900	Polynucleotidyl transferase ribonuclease H-like superfamily protein
TraesCS2B01G508000	Dihydroflavonol 4-reductase
TraesCS2B01G508100	Anthocyanidin reductase
TraesCS2B01G508200	CASP-like protein
TraesCS2B01G508300	Anthocyanidin reductase
TraesCS2B01G508400	Anthocyanidin reductase
TraesCS2B01G508500	Anthocyanidin reductase
TraesCS2B01G508600	Embryogenesis transmembrane protein-like
TraesCS2B01G508700	Anthocyanidin reductase
TraesCS2B01G508800	Kinase-like protein
TraesCS2B01G508900	Mediator of RNA polymerase II transcription subunit 15a
TraesCS2B01G509000	Disease resistance protein (TIR-NBS-LRR class) family
TraesCS2B01G509100	Glycosyltransferase
TraesCS2B01G509200	Harpin-induced protein
TraesCS2B01G509300	tRNA (Guanine(10)-N2)-methyltransferase-like protein
TraesCS2B01G509400	Harpin-induced protein
TraesCS2B01G509500	Glycosyltransferase
TraesCS2B01G509600	DEA(D/H)-box RNA helicase family protein
TraesCS2B01G509700	Organic cation transporter-like protein
TraesCS2B01G509800	SU(VAR)3-9 homolog 9
TraesCS2B01G509900	HAT dimerization domain-containing protein
TraesCS2B01G510000	Organic cation transporter protein
TraesCS2B01G510100	Organic cation transporter protein
TraesCS2B01G510200	Xyloglucan endotransglucosylase/hydrolase
TraesCS2B01G510300	Yellow stripe-like transporter 12
TraesCS2B01G510400	glutamate dehydrogenase 2
TraesCS2B01G510500	Pollen Ole e 1 allergen/extensin
TraesCS2B01G510600	Ubiquitin system component Cue protein
TraesCS2B01G510700	Pollen Ole e 1 allergen and extensin family protein
TraesCS2B01G510800	basic helix-loop-helix (bHLH) DNA-binding superfamily protein
TraesCS2B01G510900	Serine/threonine-protein kinase
TraesCS2B01G511000	Serine/threonine-protein kinase
TraesCS2B01G511200	Serine/threonine-protein kinase
TraesCS2B01G511300	Serine/threonine-protein kinase
TraesCS2B01G511400	Flowering locus T-like protein
TraesCS2B01G511500	nucleoporin
TraesCS2B01G511600	Serine/threonine-protein kinase
TraesCS2B01G511700	Serine/threonine-protein kinase
TraesCS2B01G511800	Description=Transposon protein
TraesCS2B01G511900	Esterase/lipase/thioesterase-like protein
TraesCS2B01G512000	Serine/threonine-protein kinase
TraesCS2B01G512100	Serine/threonine-protein kinase
TraesCS2B01G512200	Serine/threonine-protein kinase
TraesCS2B01G512300	Serine/threonine-protein kinase
TraesCS2B01G512400	Serine/threonine-protein kinase
TraesCS2B01G512500	Pectinesterase inhibitor
TraesCS2B01G512600	Outer-membrane lipoprotein LolB
TraesCS2B01G512700	transcription factor-like protein
TraesCS2B01G512800	F-box family protein
